# Supplementary material for: IT Professionals in the Gig Economy
Source: Springer Nature journal article supplement (doi:10.1007/s12599-023-00812-z), 2023-05-22
Supplement: MOESM1 [file 25392594]

# **IT Professionals in the Gig Economy – The Success of IT Freelancers on Digital Labor Platforms**

**Lisa Gussek, Manuel Wiesche**

Business & Information Systems Engineering (2023)

**Appendix (available online via <http://link.springer.com>)**

**Table A1:** Complete literature review table regarding signaling in online labor markets

| Assignment to Signaling Types | Source                        | Sample                            | Signal                                                                         | Signal Outcome                            |
|-------------------------------|-------------------------------|-----------------------------------|--------------------------------------------------------------------------------|-------------------------------------------|
| activating signals            | Seifried 2021                 | freelancers                       | skill value, skill portfolio, reported offline skills                          | skill distance                            |
|                               | Goes and Lin 2012             | transactions                      | certification                                                                  | willingness to seek certification         |
|                               | Pallais 2014                  | workers in an online labor market | personal information                                                           | hiring probability                        |
|                               | Kokkodis and Ipeirotis 2016   | transactions                      | category-specific quality                                                      | worker quality                            |
|                               | Kässi and Lehdonvirta 2018    | projects of gig workers           | certification                                                                  | earnings                                  |
|                               | Kokkodis and Ipeirotis 2016   | transactions                      | skills                                                                         |                                           |
| pointing signals              | Hong and Pavlou 2017          | software development projects     | reputation                                                                     | buyer selection                           |
|                               | Yoganarasimhan 2013           | freelancers                       | price, reputation                                                              |                                           |
|                               | Hong and Pavlou 2012          | crowdworkers                      | average feedback ratings, project experience                                   | provider pricing                          |
|                               | Gefen and Carmel 2008         | programming transactions          | relative bid price, purchasing power parity, client loyalty                    | winning bid                               |
|                               | Assemi and Schlagwein 2016    | crowdworkers                      | reviews, average weighted rating, positive ratings, positive/negative comments | customer decision                         |
|                               | Horton 2019                   | recruiting invitations            | capacity of workers                                                            | hiring probability                        |
|                               | Mill 2011                     | freelancers                       | reputation                                                                     |                                           |
|                               | Benson et al. 2020            | workers in an online labor market | reputation                                                                     | jobs, rejection rate, time to payment     |
|                               | Lin et al. 2018               | transactions                      | reputation, portfolio items                                                    |                                           |
|                               | Hesse et al. 2020             | platform users                    | rating, text review, profile image, self-description, identity verification    | platform's degree of social interaction   |
|                               | Moreno and Terwiesch 2014     | software development transactions | reputation                                                                     | probability of being selected, price      |
|                               | Rahman 2018                   | client-contractor interactions    | ratings                                                                        | reputation                                |
|                               | Kanat et al. 2018             | IT service providers              | reputation                                                                     | service provider survival                 |
|                               | pointing & activating signals | Durward et al. 2016               | crowdworkers                                                                   | different pointing and activating signals |
| Kathuria et al. 2021          |                               | transactions                      | skill and achievement signals                                                  | supplier quality                          |
| Holthaus and Stock 2017       |                               | freelancers                       | character traits, conventional and assessment signals                          | earnings                                  |
| Holthaus and Stock 2018       |                               | freelancers                       | tests, portfolio items, rating, self-promotion, ingratiation, price            |                                           |
| Claussen et al. 2018          |                               | freelancer                        | skills, self-description, project experience                                   |                                           |
| Banker and Hwang 2008         |                               | accounting services               | past performance, achievements, skill certifications, top rated button         | sales performance                         |
| Lehdonvirta et al. 2019       |                               | transactions, micro providers     | platform-generated, platform-verified and unverified signals                   | pay rate                                  |
| supporting & pointing signal  | Stanton and Thomas 2016       | workers in an online labor market | outsourcing agency affiliation, feedback score                                 | hiring probability, wages                 |

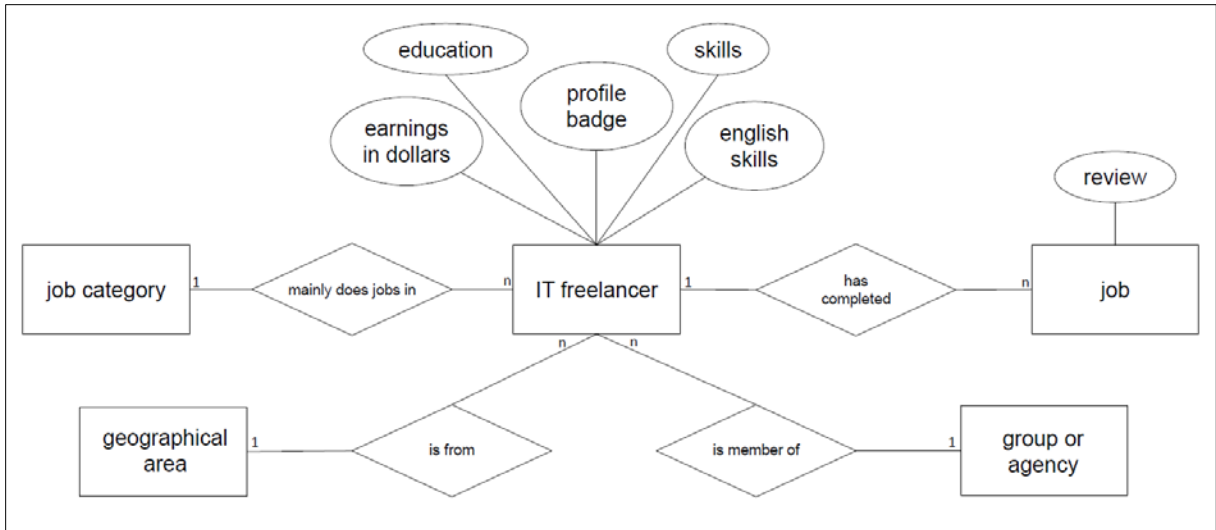

**Figure A1: Data structure**

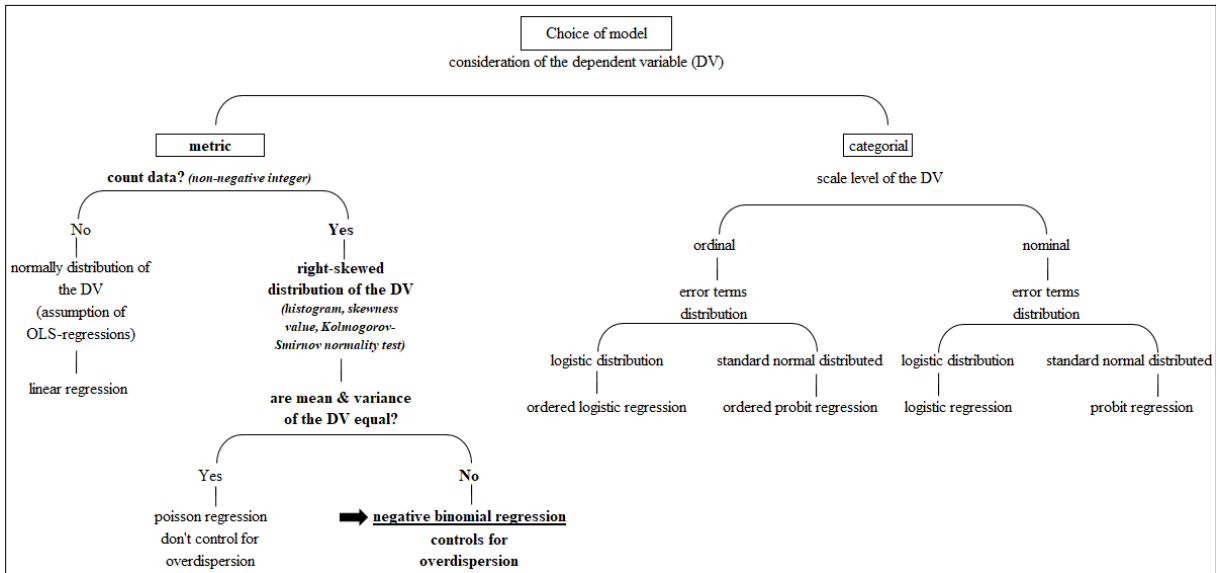

**Figure A2: Process of model choice for data analysis**
